# Supplementary material for: Recurrent evolutionary switches of mitochondrial cytochrome c maturation systems in Archaeplastida
Source: Springer Nature journal article supplement (doi:10.1038/s41467-024-45813-y), 2024-02-20
Supplement: 41467_2024_45813_MOESM1_ESM.pdf [file 41467_2024_45813_MOESM1_ESM.pdf]

**Recurrent evolutionary switches of mitochondrial cytochrome *c* maturation systems in Archaeplastida**

Li *et al.*

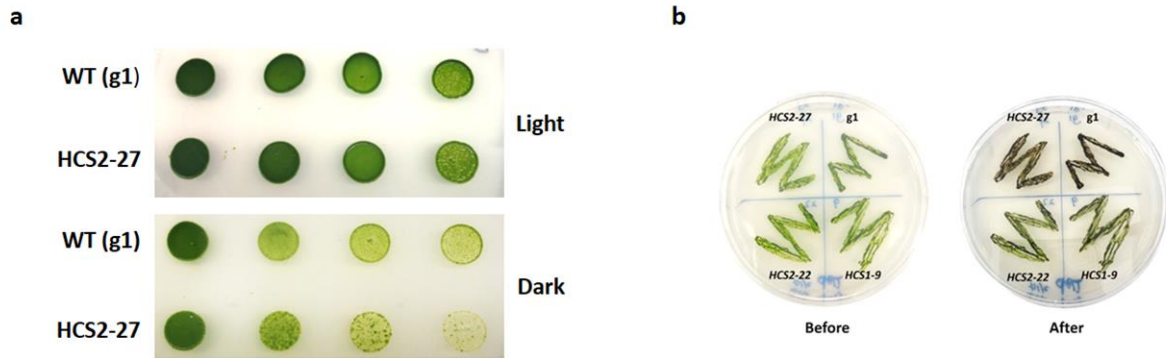

**Supplementary Fig. 1. Spot test assay and TTC staining of *Chlamydomonas* HCS mutants. a,** The in-frame HCS2-27 mutant exhibits growth deficiency in the dark. **b,** Compared to the WT g1 strain and HCS2-27, knock-out mutants HCS1-9 and HCS2-22 remain green after TTC staining, indicating a disruption of their mitochondrial ETC functionality.

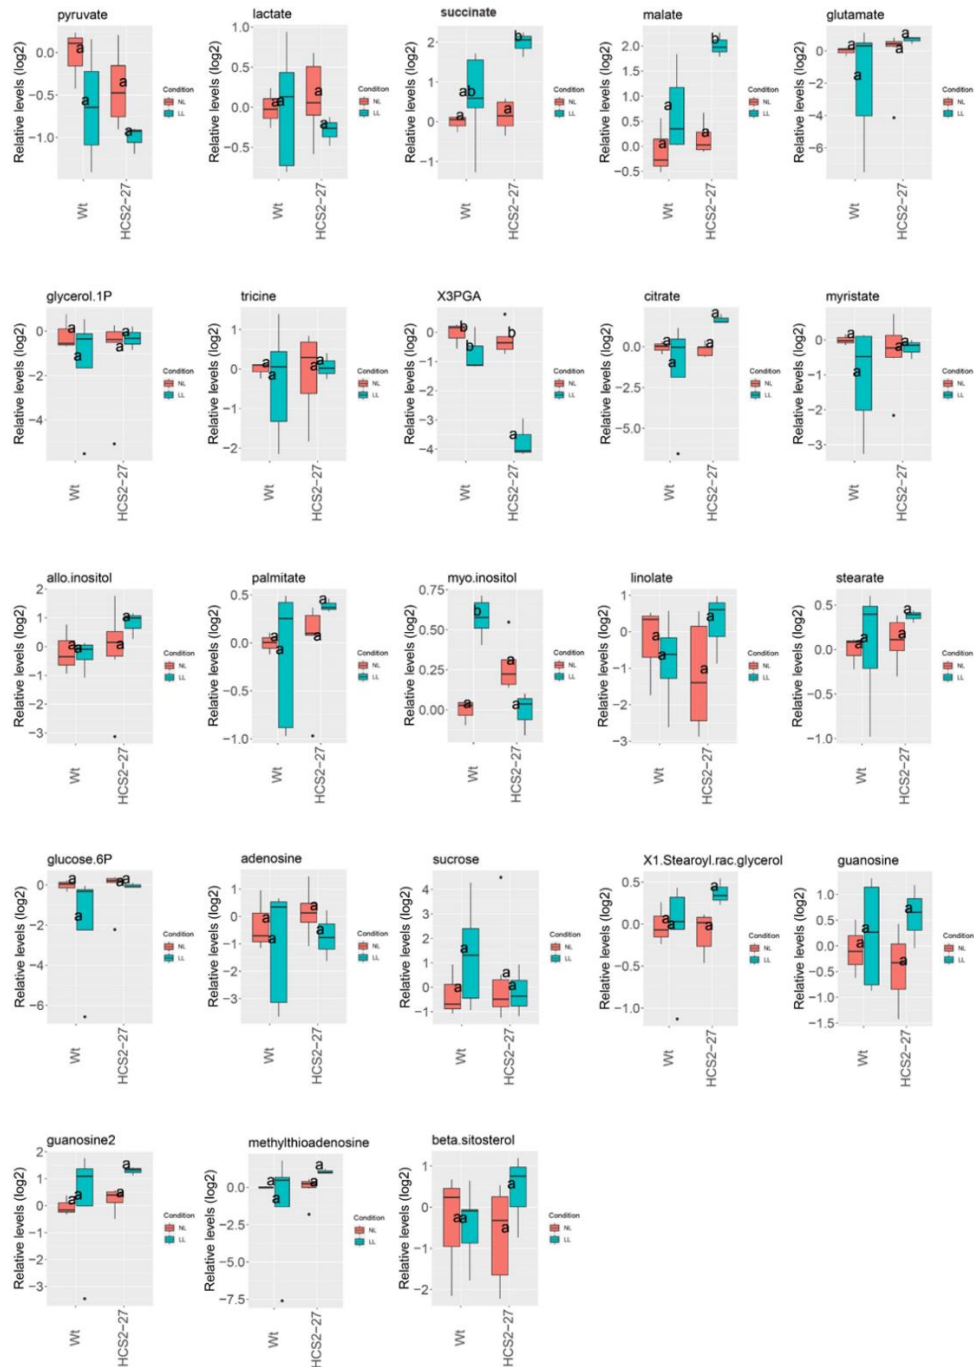

**Supplementary Fig. 2. Metabolic analysis of *Chlamydomonas* HCS knock-down mutant (HCS2-27) and the wild type (Wt) grown under normal light (NL) and low light (LL) conditions.** The relative metabolite levels were normalized by the mean of those in Wt/NL conditions and log<sub>2</sub> transformed. The boxplots show the minimum, first quartile, median, third quartile, and maximum relative levels (n = 3, 6, 4, 3 for each sample). Letters indicate significant differences between mean values (one-way ANOVA: Tukey's multiple comparisons test, P < 0.05), and groups with the same letters are not significantly different. Source data are provided as a Source Data file.

Streptophytes  
 Chlorophytes  
 Rhodophytes  
 Stramenopiles  
 Haptophytes  
 Glaucophytes  
 Dictyostelids  
 Animals  
 Fungi  
 Alveolates

0.1 subs/site

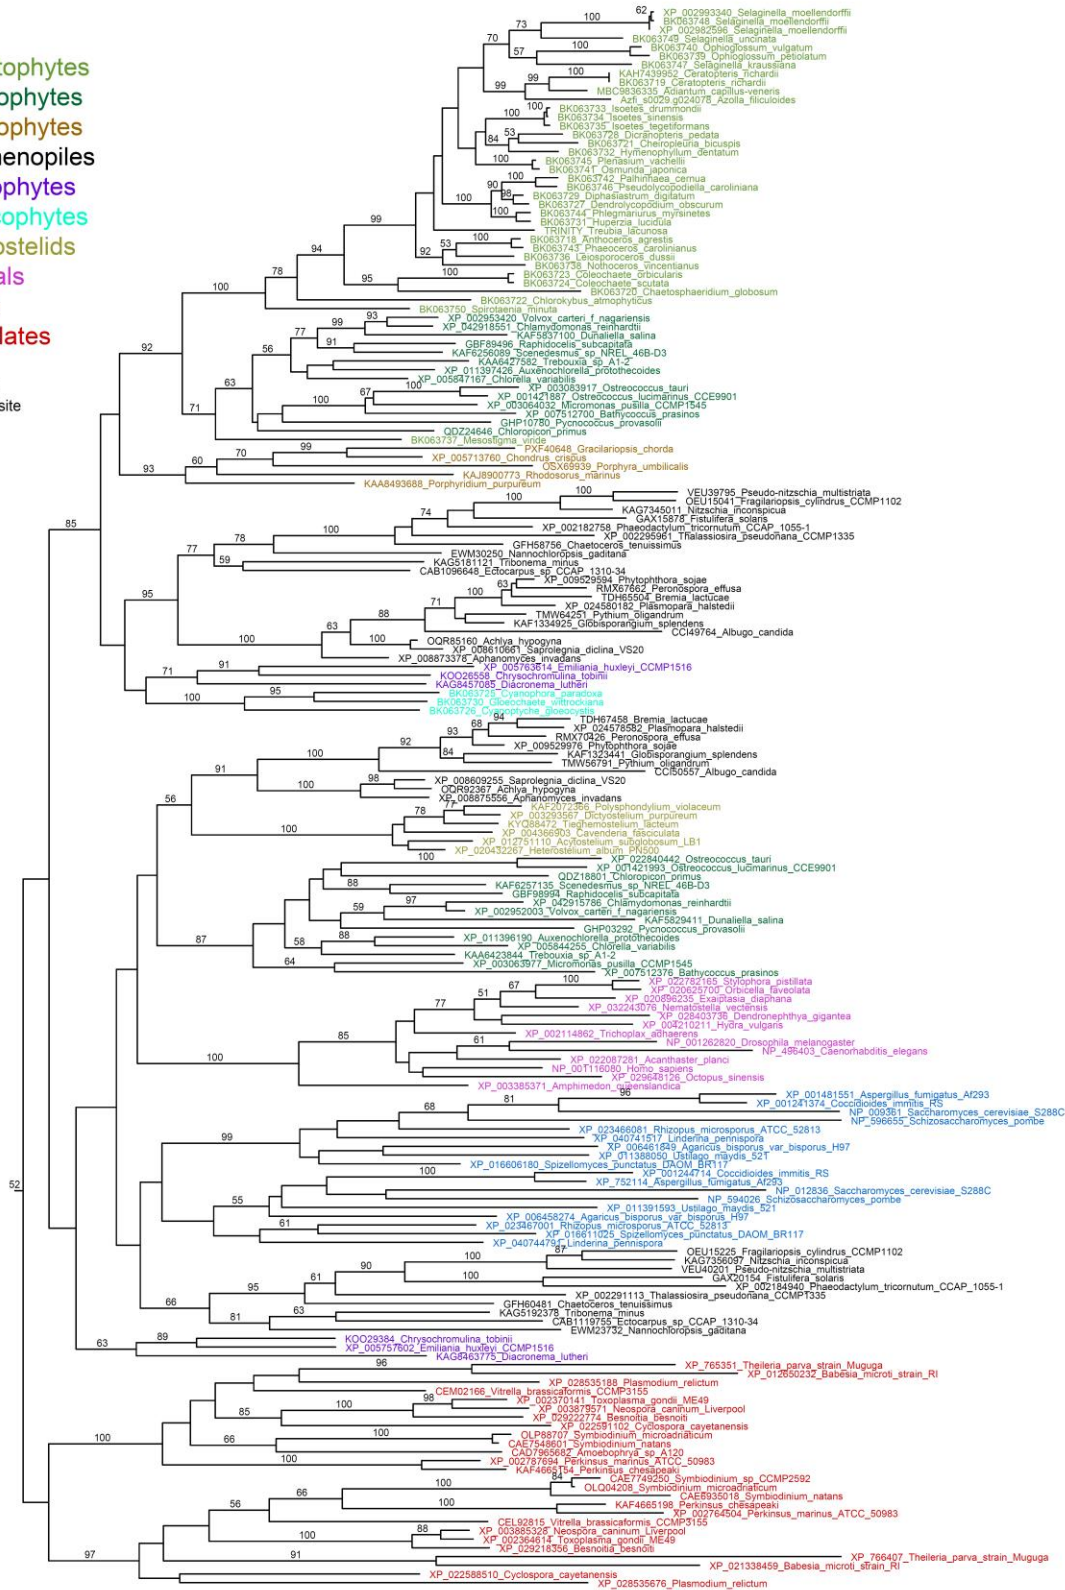

**Supplementary Fig. 3. Fully labeled ML tree corresponding to Figure 7A.** Bootstrap values <50% not shown. Tree was rooted by midpoint rooting.

Streptophytes  
 Chlorophytes  
 Rhodophytes  
 Stramenopiles  
 Haptophytes  
 Glaucophytes  
 Dictyostelids  
 Animals  
 Fungi  
 Alveolates

0.1 subs/site

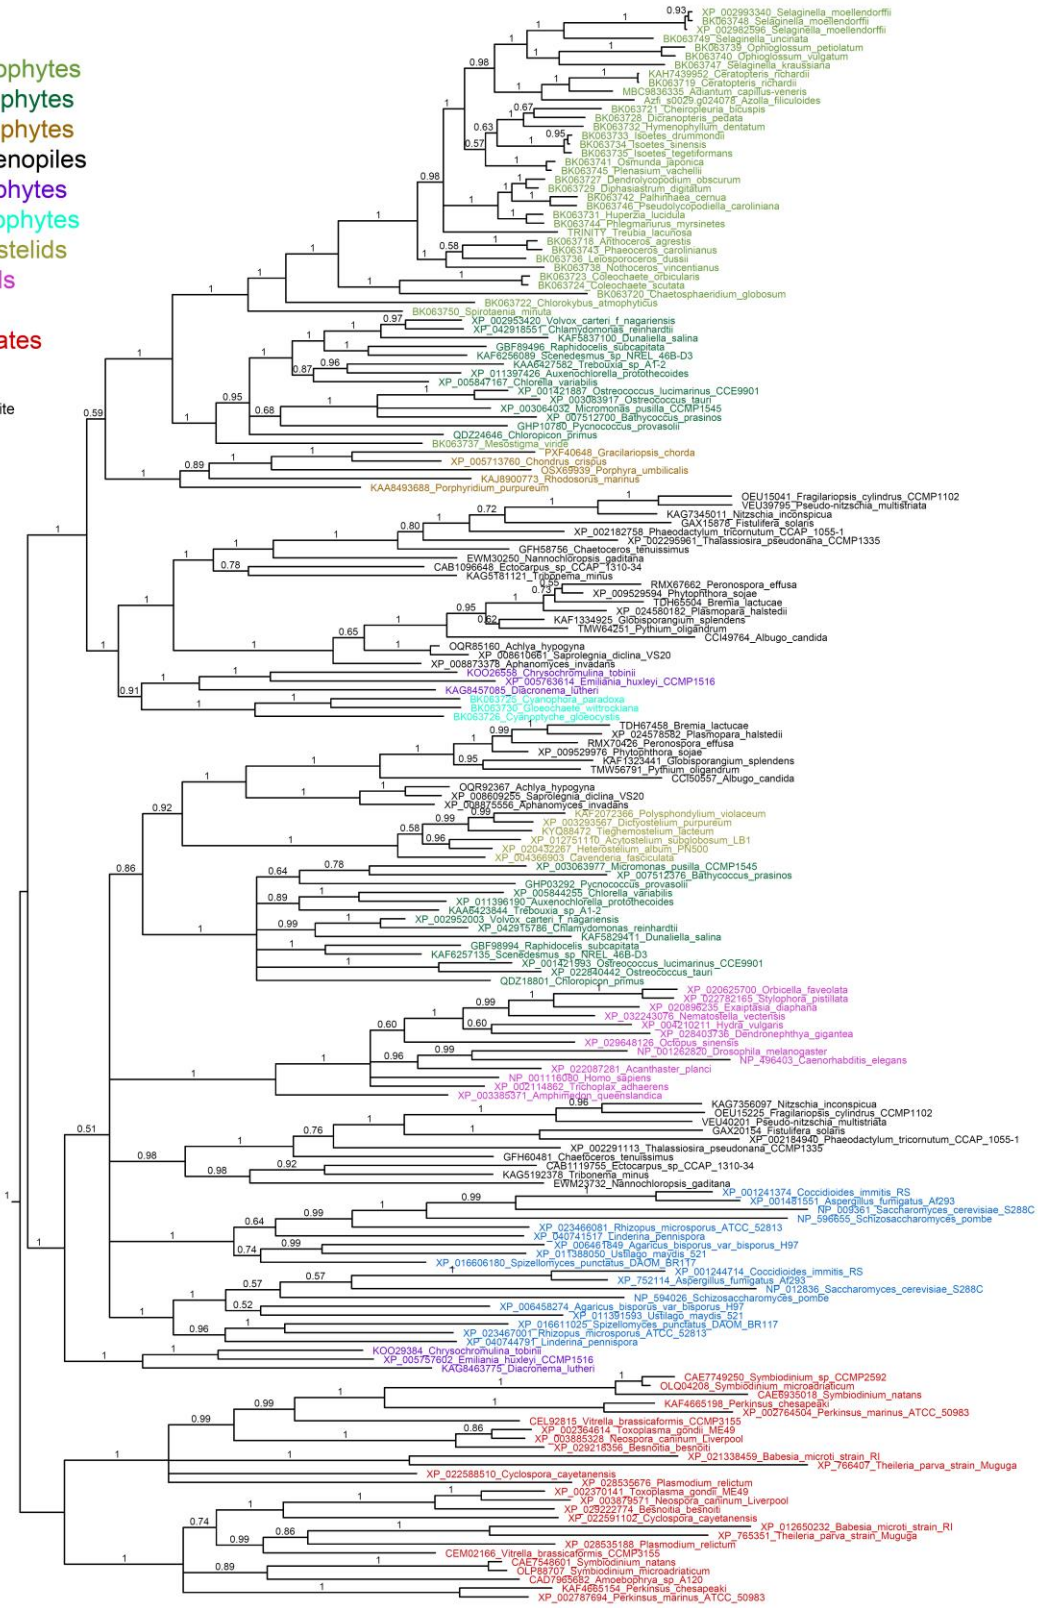

Supplementary Fig. 4. Fully labeled Bayesian tree corresponding to Figure 7A. Posterior probabilities <0.5 not shown. Tree was rooted by midpoint rooting.

**Supplementary Table 1. Sequence features and subcellular localization prediction of *C. reinhardtii* HCS.**

| Gene name      | Phytozome ID  | Genbank ID | CDS (bp) | 5'UTR (bp) | Exon | Intron | Subcellular localization |            |
|----------------|---------------|------------|----------|------------|------|--------|--------------------------|------------|
|                |               |            |          |            |      |        | PredAlgo                 | WoLF PSORT |
| <i>CreHCS1</i> | Cre12.g525700 | 5722497    | 879      | 359        | 5    | 4      | M                        | M          |
| <i>CreHCS2</i> | Cre16.g690050 | 5724796    | 960      | 0          | 6    | 5      | M                        | M          |

CDS, coding sequencing; UTR, untranslated region; M, mitochondrion; PredAlgo (<http://lobosphaera.ibpc.fr/predalgo>) and WoLF PSORT (<https://wolfsort.hgc.jp/>).

**Supplementary Table 2. Accession numbers for query sequences used for blast searches.**

| Species                           | System I proteins  |              | System III proteins |              |
|-----------------------------------|--------------------|--------------|---------------------|--------------|
| Land plants                       |                    |              |                     |              |
| <i>Arabidopsis thaliana</i>       | CCMA               | NP_176516    | -                   | -            |
|                                   | CCMB               | YP_009472099 | -                   | -            |
|                                   | CCMC               | YP_009472125 | -                   | -            |
|                                   | CCME               | NP_190747    | -                   | -            |
|                                   | CCMF <sub>C</sub>  | YP_009472113 | -                   | -            |
|                                   | CCMF <sub>N1</sub> | YP_009472126 | -                   | -            |
|                                   | CCMF <sub>N2</sub> | YP_009472124 | -                   | -            |
|                                   | CCMH               | NP_563966    | -                   | -            |
| <i>Selaginella moellendorffii</i> | -                  | -            | HCCS                | XP_002982596 |
| Green algae                       |                    |              |                     |              |
| <i>Chlamydomonas reinhardtii</i>  | -                  | -            | HCS1                | XP_042918551 |
|                                   | -                  | -            | HCS2                | XP_042915786 |
| <i>Klebsormidium nitens</i>       | CCMA               | GAQ83552     | -                   | -            |
|                                   | CCMB               | GAQ93830     | -                   | -            |
|                                   | CCMC               | GAQ93831     | -                   | -            |
|                                   | CCME               | GAQ86245     | -                   | -            |
|                                   | CCMF               | GAQ93806     | -                   | -            |
|                                   | CCMH               | GAQ81871     | -                   | -            |
|                                   | -                  | -            | -                   | -            |
| Red algae                         |                    |              |                     |              |
| <i>Cyanidioschyzon merolae</i>    | CCMA               | BAA36528     | -                   | -            |
|                                   | CCMB               | BAA36529     | -                   | -            |
|                                   | CCMC               | BAA36544     | -                   | -            |
|                                   | CCME               | XP_005536347 | -                   | -            |
|                                   | CCMF               | BAA36527     | -                   | -            |
|                                   | CCMH               | XP_005534965 | -                   | -            |
|                                   | -                  | -            | -                   | -            |
| <i>Chondrus crispus</i>           | -                  | -            | HCCS                | XP_005713760 |
