# Supplementary material for: Recurrent evolutionary switches of mitochondrial cytochrome c maturation systems in Archaeplastida
Source: Springer Nature journal article supplement (doi:10.1038/s41467-024-45813-y), 2024-02-20
Supplement: 41467_2024_45813_MOESM3_ESM.pdf [file 41467_2024_45813_MOESM3_ESM.pdf]

## **Description of Additional Supplementary Files**

Supplementary Data 1: Metabolomics information

Supplementary Data 2: Accession numbers for additional sequencing data used

Supplementary Data 3: Information for transgenic work
